# Supplementary material
Source: PubMed Central journal article supplement (PMC9213532)
Supplement: 41396_2022_1236_MOESM1_ESM.pdf [file 41396_2022_1236_MOESM1_ESM.pdf]

## SUPPLEMENTARY INFORMATION

### *Bradyrhizobium diazoefficiens* USDA 110, GA biosynthetic operon

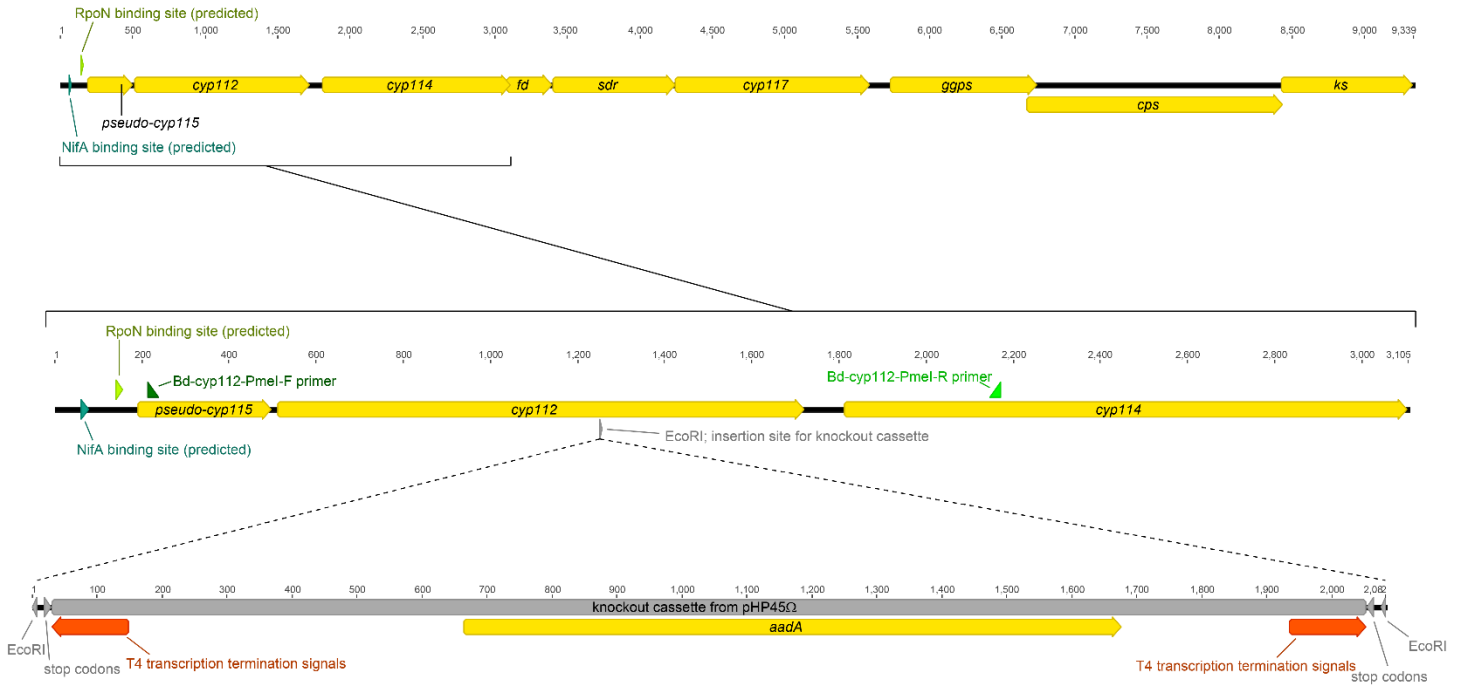

**Supplementary Figure 1. Schematic of GA operon knockout strategy.** Polar knockouts of the GA operon in *Bradyrhizobium diazoefficiens* USDA 110 were constructed by inserting a knockout cassette containing *aadA* and flanking terminators (derived from pHP45 $\Omega$  [1]) into *cyp112*.

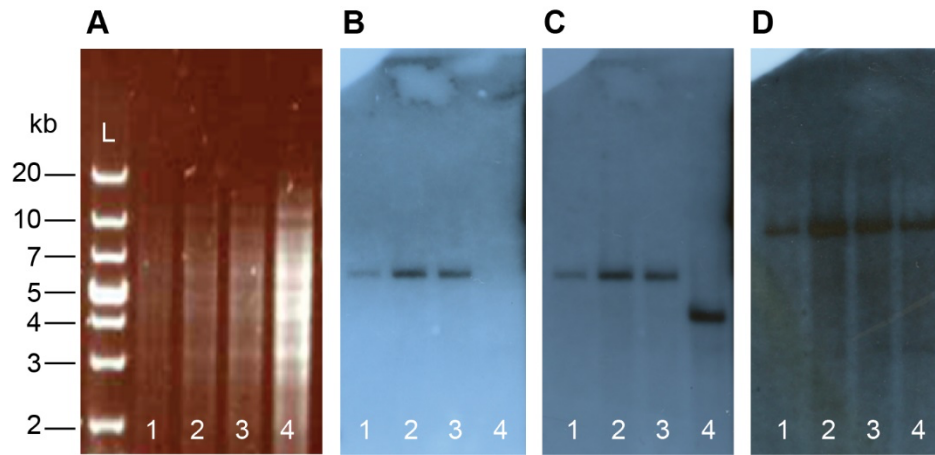

**Supplementary Figure 2. Southern blot analysis of *B. diazoefficiens* USDA 110 GA operon knockout strains KB0903, KB0904, and KB2011.** A) Agarose gel of XhoI gDNA digests. The gel was loaded as follows: L = DNA ladder, 1 = KB0903, 2 = KB0904, 3 = KB2011, and 4 = *B. diazoefficiens* USDA 110 (wild type). Panels B-D are blots of the gel in panel A probed with the following: B) *aadA*, C) *cyp112*, D) *cyp114*. kb = kilobase

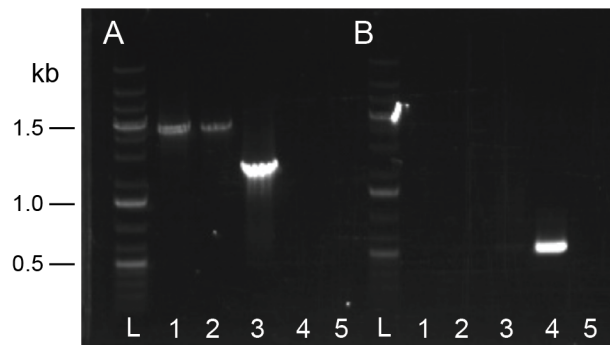

**Supplementary Figure 3. PCR analysis of *B. diazoefficiens* USDA 110 GA operon knockout strains KB0904 and KB2011.** a) PCR with primer set targeting the chromosomal region outside of the insertion of the *aadA* interruption cassette (primers bind to the *pseudo cyp115* and *cyp114* genes). b) PCR with primer set targeting the *sacB* gene of the pLOBJ3 suicide vector used for introducing the interruption cassette. Lanes 1-5 correspond to the following template DNA: 1 = KB2011, 2 = KB0904, 3 = *B. diazoefficiens* USDA 110 (wild type), 4 = pLOBJ3 mating vector, and 5 = no DNA; L = DNA ladder. kb = kilobase

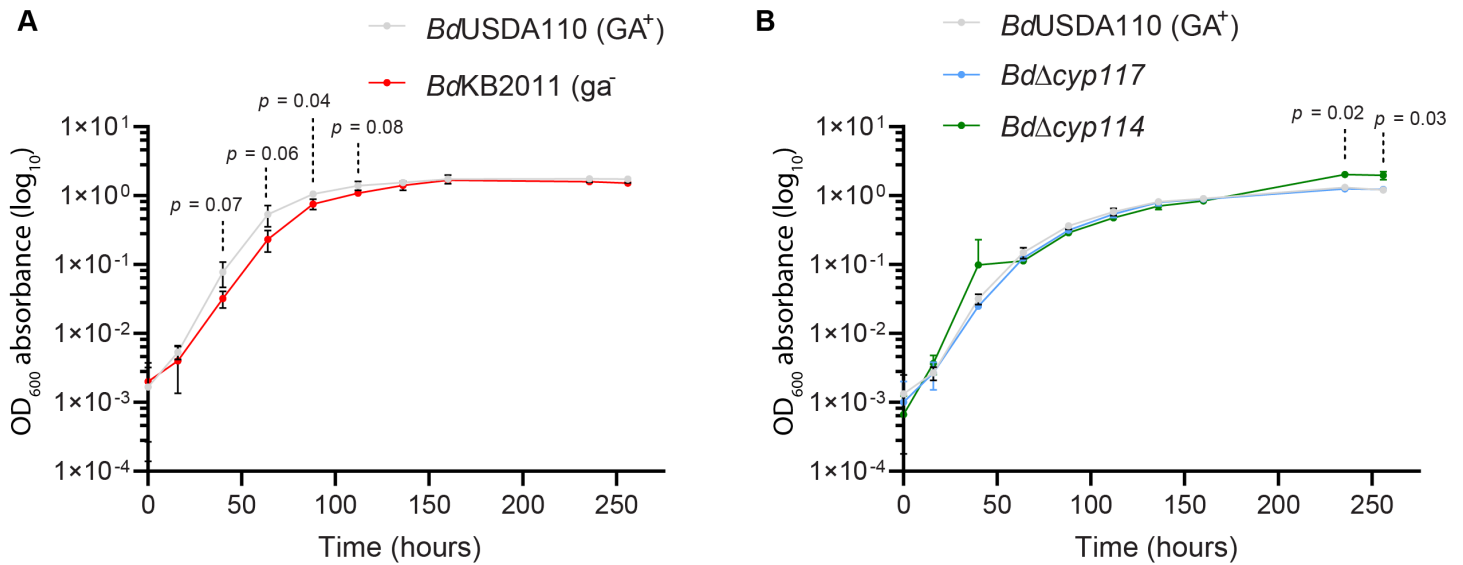

**Supplementary Figure 4. Aerobic growth curves of *B. diazoefficiens* USDA110 (GA<sup>+</sup>) and GA operon mutants. A)** GA<sup>+</sup> (*BdUSDA110*) growth compared to that of ga<sup>-</sup> (*BdKB2011*), as measured by the optical density of the cultures measured at a wavelength of 600 nm (OD<sub>600</sub>). Note that the y-axis is on a log<sub>10</sub> scale. Statistical significance for each time point was determined with an unpaired t-test. *P*-values less than 0.1 are shown above the relevant time points. All other time points had a *P*-value > 0.1. *n* = 3 cultures for each strain with the mean ± SD shown. **B)** GA<sup>+</sup> growth compared to that of *cyp117* and *cyp114* deletion mutants (*BdΔcyp117* and *BdΔcyp114*, respectively). Note that the y-axis is on a log<sub>10</sub> scale. *n* = 3 cultures for each strain with the mean ± SD shown. After 40 hours, one of the GA<sup>+</sup> cultures was contaminated, so only two replicates were measured for subsequent time points. Statistical significance for each time point was determined with separate unpaired t-tests between GA<sup>+</sup>/*BdΔcyp117* and GA<sup>+</sup>/*BdΔcyp114*. All *p* values were > 0.05 except for those indicated in the figure for *BdΔcyp114*.

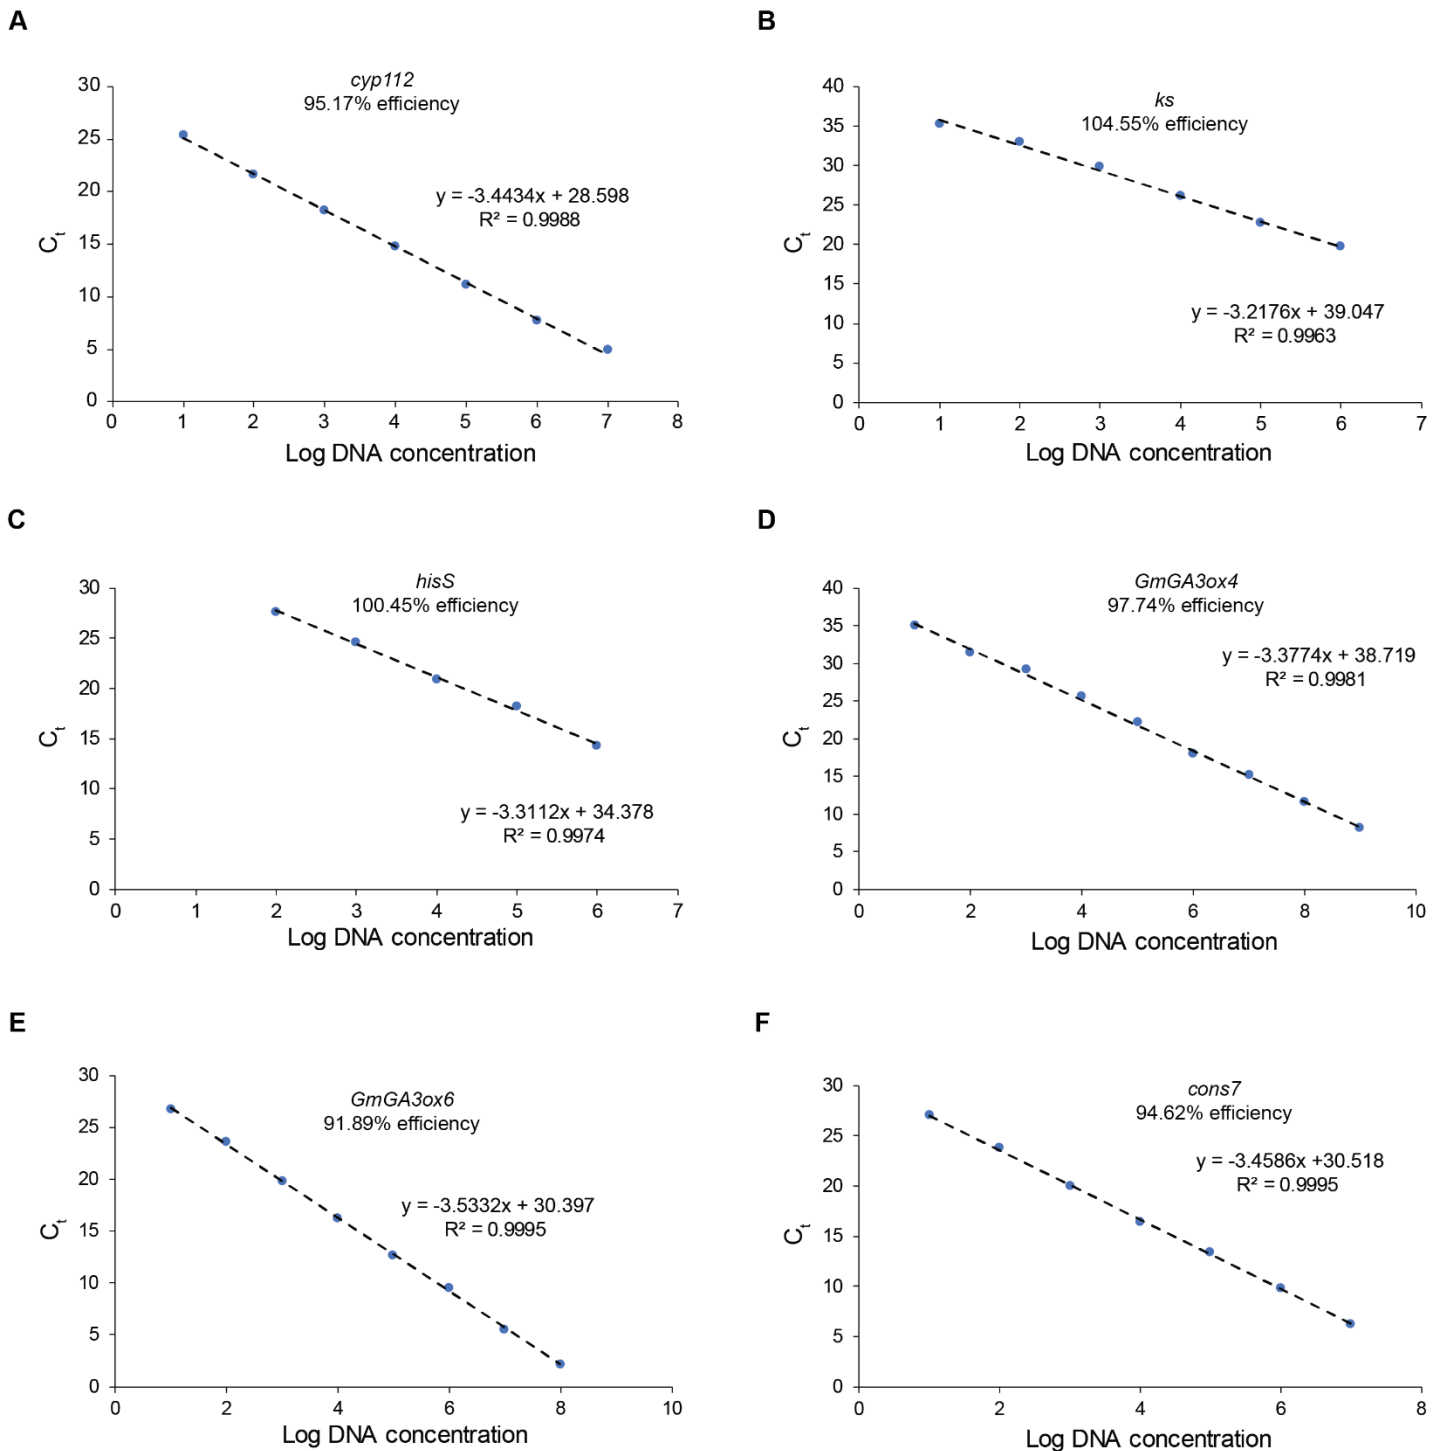

**Supplementary Figure 5. qPCR primer efficiencies.** Shown are the calculated cycle threshold ( $C_t$ ) values plotted against the corresponding DNA template concentration (log scale) for the qPCR primer sets used to quantify expression for **A)** *cyp112*, **B)** *ks*, and **C)** *hisS* (reference gene) from *B. diazoefficiens* USDA 110, along with **D)** *GA3ox4*, **E)** *GA3ox6*, and **F)** *cons7* (reference gene) from *G. max* cv. Williams '82.



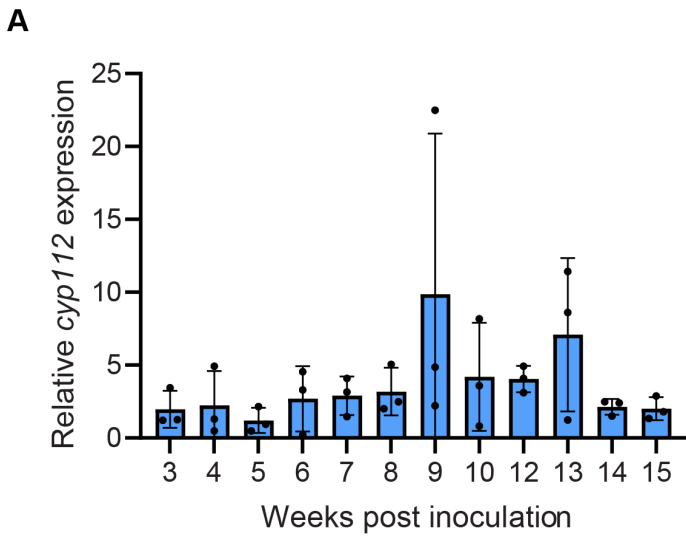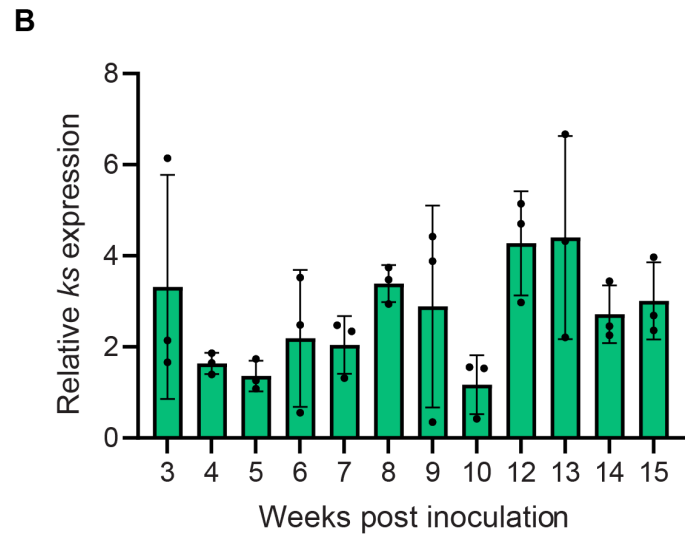

**Supplementary Figure 6. Expression of GA operon genes during the *Bradyrhizobium diazoefficiens*-soybean symbiosis.** Bacteroid expression of **A)** *cyp112* and **B)** *ks* over the course of *B. diazoefficiens* USDA 110 symbiosis with soybean. Target gene expression was normalized using *B. diazoefficiens* USDA 110 *hisS* as a reference gene, and relative expression was then calculated by dividing all values by the lowest mean expression value of the data set. n = 3 biological replicates (nodules derived from three different plants) for each time point with  $\pm$  standard deviation (SD) shown.

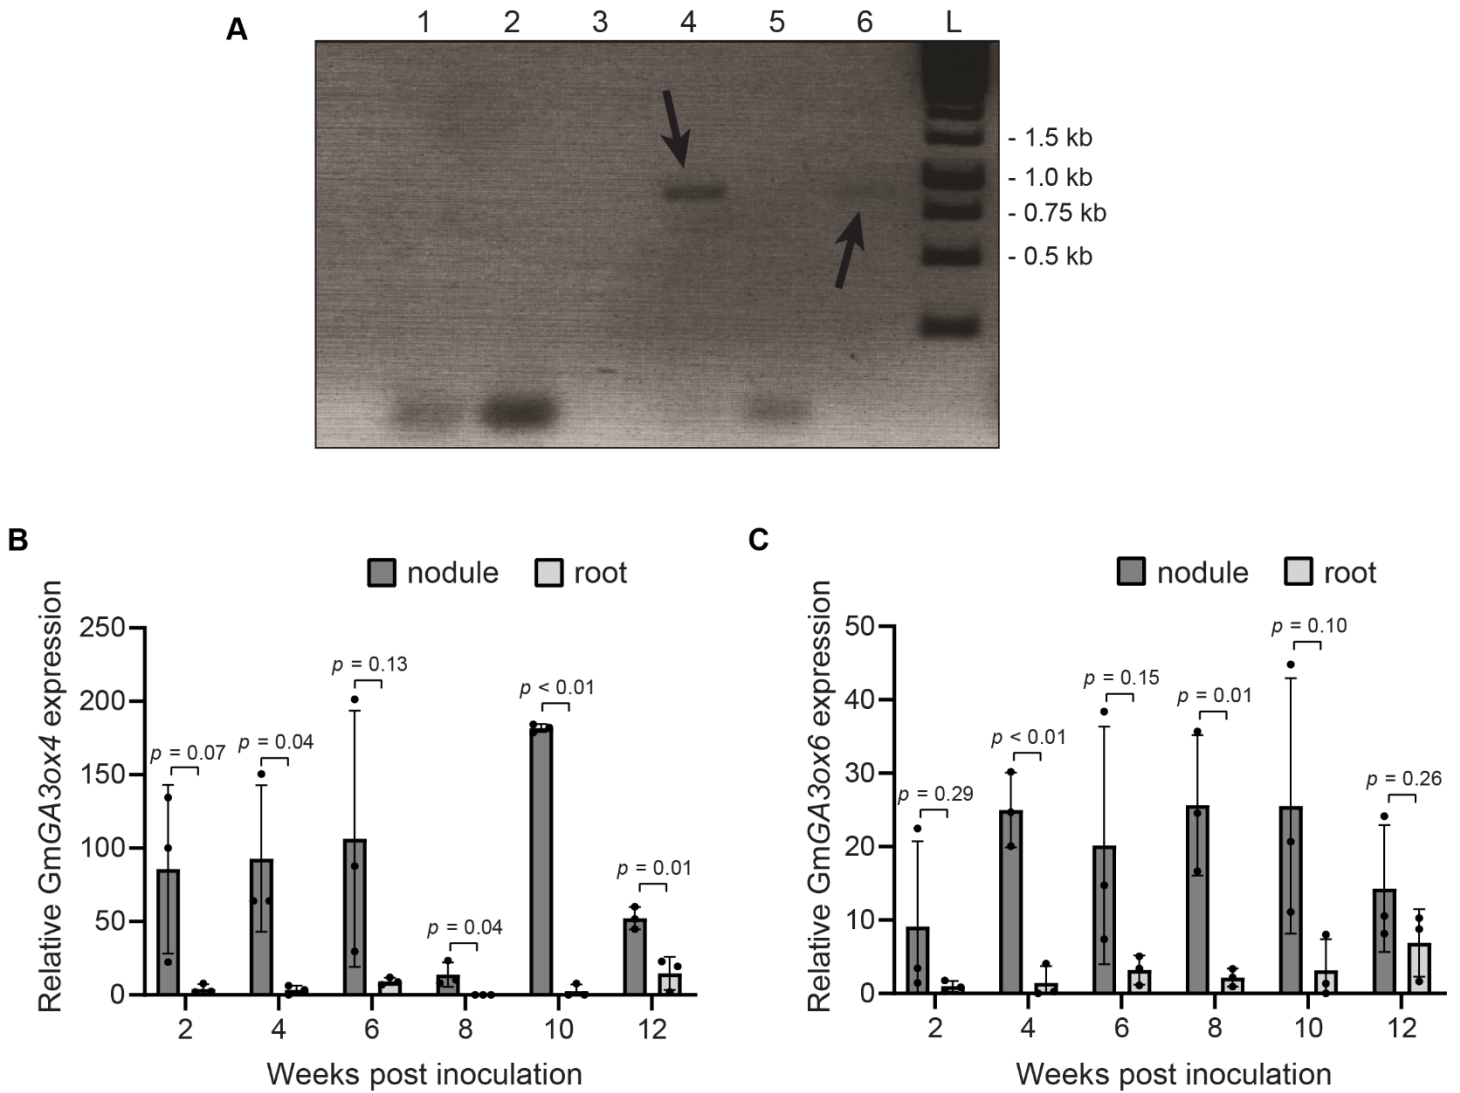

**Supplementary Figure 7. Expression of soybean GA 3-oxidase isoforms in nodule tissue.** A) PCR with cDNA isolated from mature nodules (during flowering stage) demonstrates that two isoforms are noticeably expressed in this tissue, as shown via agarose gel analysis. Primers for this PCR were design to produce amplicons of roughly 800-1000 base pairs. Arrows indicate detected amplicon bands. 1: *GmGA3ox1*, 2: *GmGA3ox2*, 3: *GmGA3ox3*, 4: *GmGA3ox4*, 5: *GmGA3ox5*, 6: *GmGA3ox6*, L: DNA ladder. kb = kilobase. Expression of B) *GmGA3ox4* and C) *GmGA3ox6* was confirmed via qPCR analysis of cDNA prepared from soybean nodule and root tissue over 12 weeks of development. Target gene expression was normalized using *G. max* cv. Williams '82 *cons7* as a reference gene, and relative expression was then calculated by dividing values by the mean expression value of the lowest mean within the data set.  $n = 3$  for each tissue at each time point. Each replicate represents cDNA samples prepared from tissue derived from different plants. Shown for each condition is the mean  $\pm$  SD. Statistical comparisons for each time point were made using two-tailed t-tests.

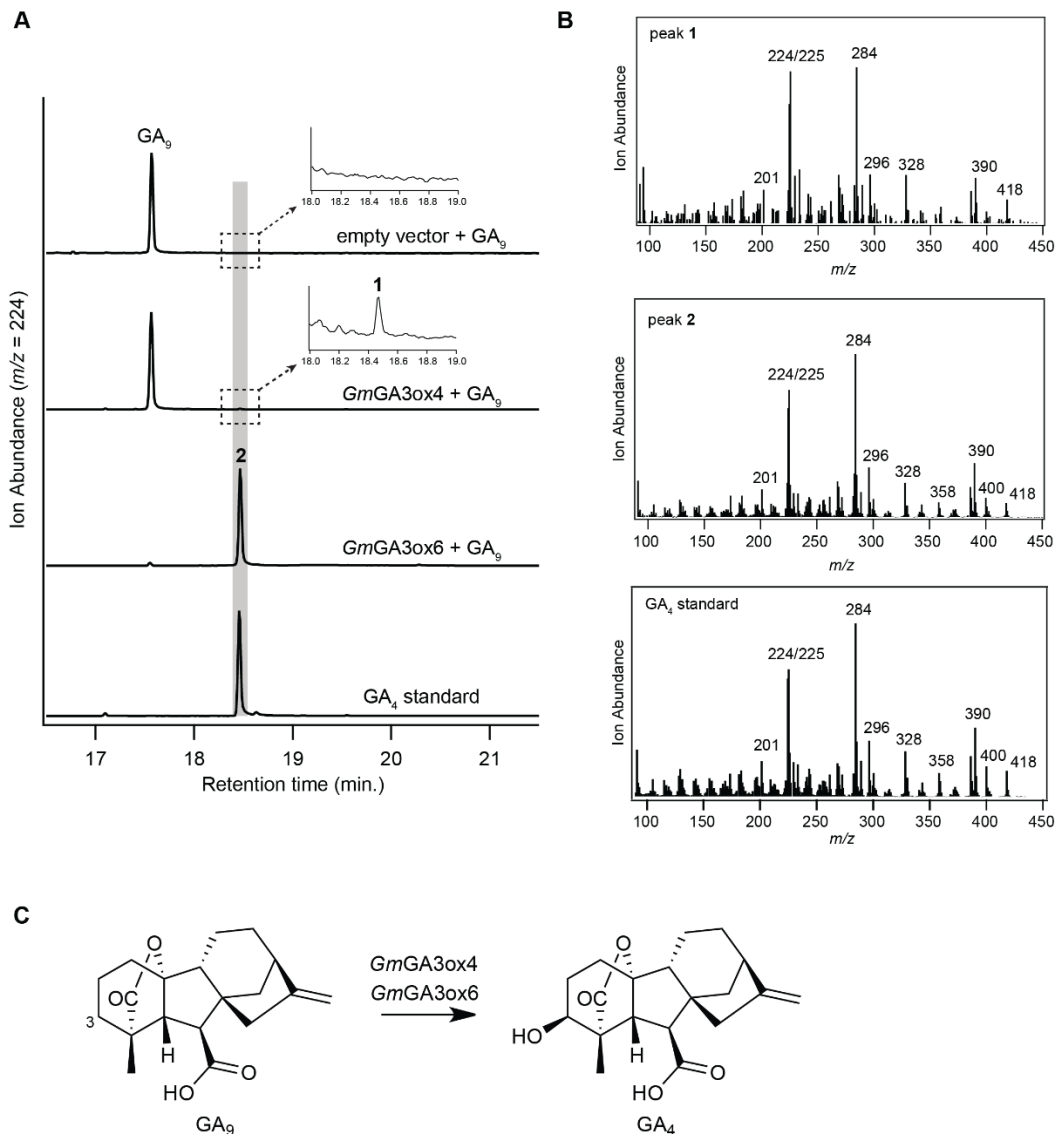

**Supplementary Figure 8. Confirmation of GA 3-oxidase activity by *GmGA3ox4* and *GmGA3ox6*.** **A)** Incubating GA<sub>9</sub> in cells expressing synthetic clones of either *GmGA3ox4* or *GmGA3ox6* results in consumption of GA<sub>9</sub> and production of GA<sub>4</sub>, as shown here through extracted ion chromatograms from GC-MS analysis. **B)** Mass spectra of the putative GA<sub>4</sub> products and an authentic GA<sub>4</sub> standard. The chromatograms and spectra shown are representative of the methyl ester (GA<sub>9</sub>) or methyl ester, trimethylsilyl ether (GA<sub>4</sub>) of the corresponding compounds. **C)** Reaction proposed to be catalyzed by *GmGA3ox4* and *GmGA3ox6* - 3 $\beta$ -hydroxylation of GA<sub>9</sub> to produce bioactive GA<sub>4</sub>.

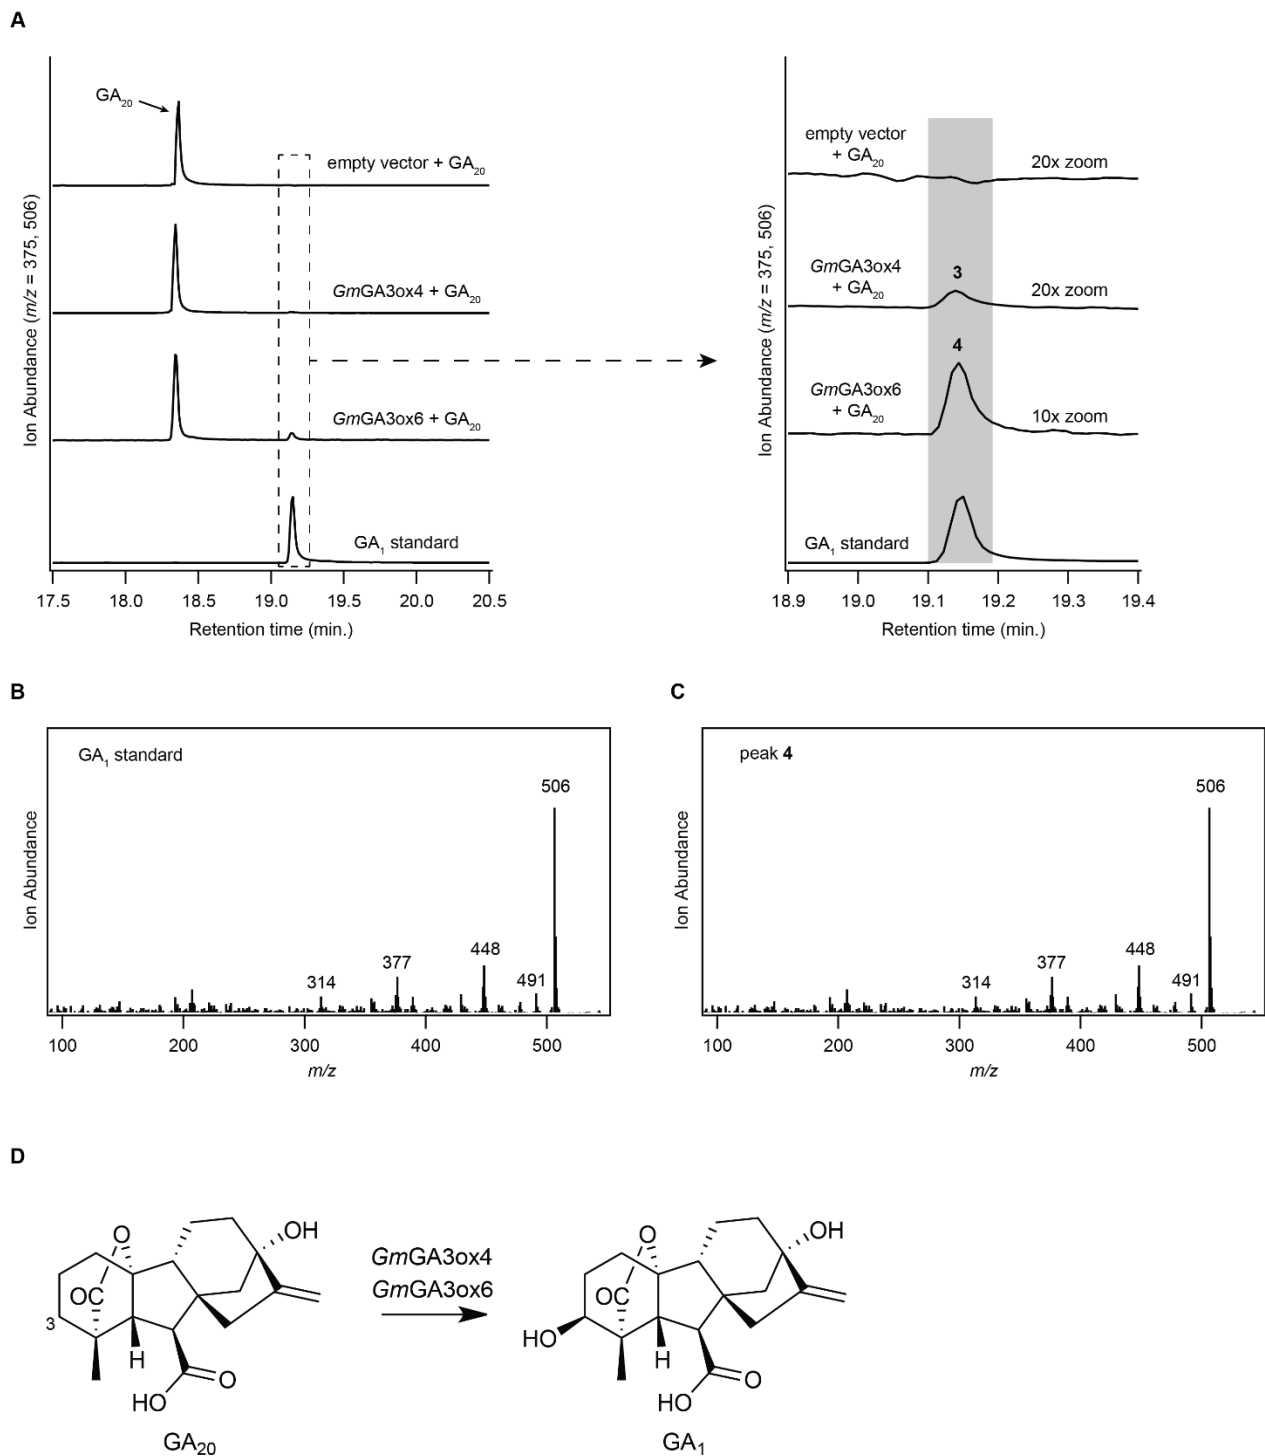

**Supplementary Figure 9. *GmGA3ox4* and *GmGA3ox6* exhibit GA 3-oxidase activity with  $GA_{20}$ .** A) Incubation of  $GA_{20}$  in *E. coli* cells expressing either *GmGA3ox4* or *GmGA3ox6* results in formation of  $GA_1$ , as shown here via extracted ion chromatograms from GC-MS analysis. B) Mass spectrum of an authentic  $GA_1$  standard. C) Mass spectrum of peak 4, a putative  $GA_1$  peak produced from incubation of  $GA_{20}$  with *GmGA3ox6*-expressing cells. The abundance of peak 3 was too low for a high-quality mass spectrum to be derived. The chromatograms and spectra shown are representative of the methyl ester, trimethylsilyl ether of the corresponding compounds. D) Proposed  $3\beta$ -hydroxylation of  $GA_{20}$  by *GmGA3ox4* and *GmGA3ox6* to produce bioactive  $GA_1$ .

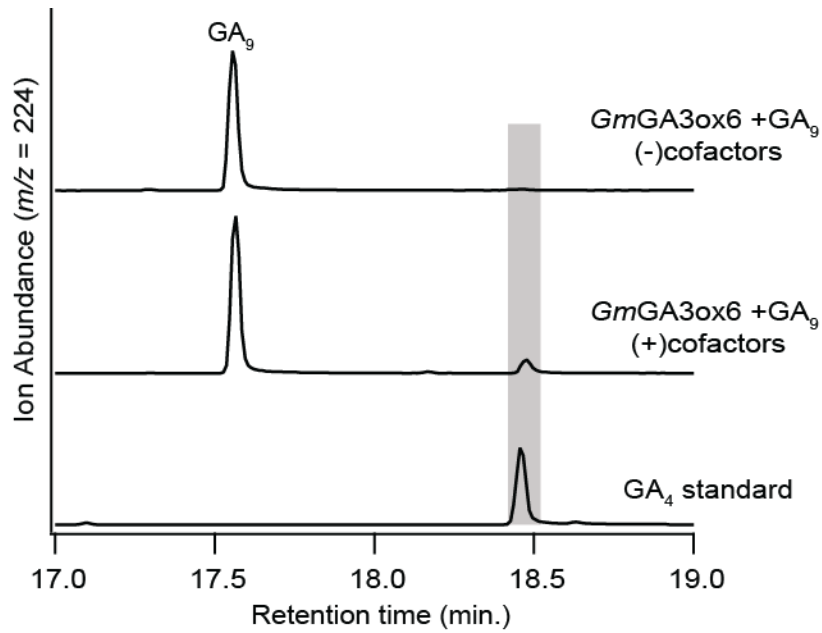

**Supplementary Figure 10. Confirmation of *GmGA3ox6* as a 2ODD enzyme.** Lysates from cells expressing *GmGA3ox6* were incubated with GA<sub>9</sub> in either the presence or absence of Fe(II)/2-oxoglutarate dependent dioxygenase (2ODD) cofactors (2-oxoglutarate, ascorbate, and iron). Production of GA<sub>4</sub> was detected with GC-MS, as shown here with representative extracted ion chromatograms. The chromatograms shown correspond to the methyl ester (GA<sub>9</sub>) or methyl ester, trimethylsilyl ether (GA<sub>4</sub>) of the corresponding compounds. Due to the high homology and similar functionality demonstrated between *GmGA3ox4* and *GmGA3ox6*, the status of *GmGA3ox4* as a 2ODD enzyme is inferred.

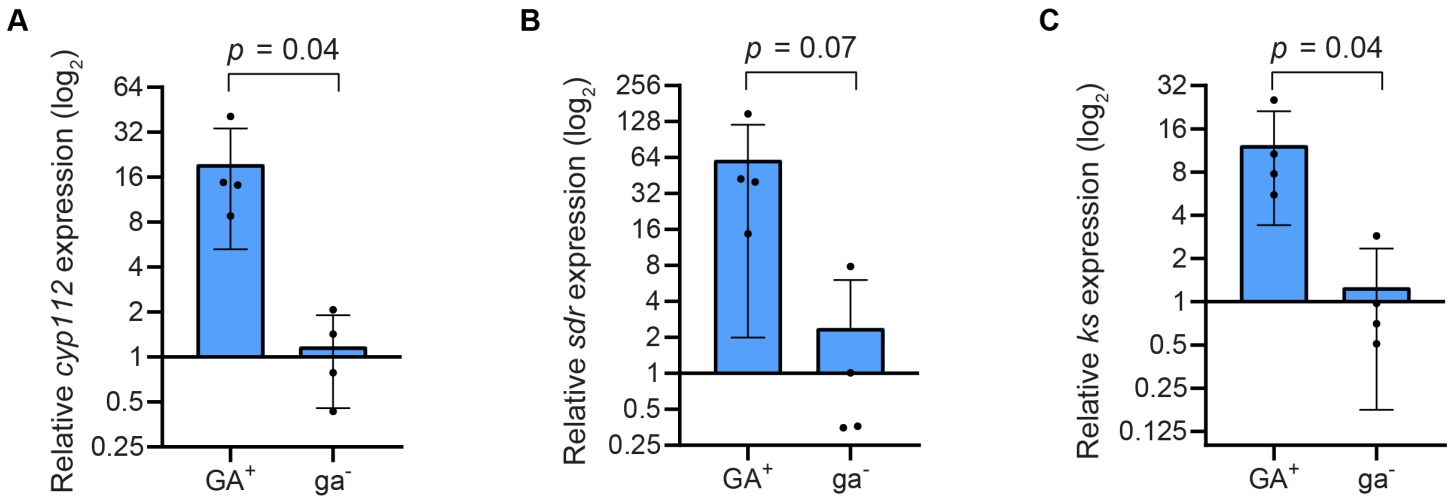

**Supplementary Figure 11. Expression of GA operon genes in GA<sup>+</sup> and ga<sup>-</sup> *B. diazoefficiens* bacteroids.** Relative expression of **A)** *cyp112*, **B)** *sdr*, and **C)** *ks* as determined via qPCR with cDNA generated from post-flowering stage GA<sup>+</sup> or ga<sup>-</sup> bacteroids. Target gene expression was normalized using *B. diazoefficiens* USDA 110 *hisS* as a reference gene, and relative expression was then calculated by dividing values by the mean expression value of the corresponding ga<sup>-</sup> expression data. n = 4 biological replicates with ± SD shown. Data is shown on a log<sub>2</sub> scale, with statistics performed on the non-log-transformed data. Statistical significance was assessed using a one-tailed Welch's t-test. Trace amounts of GA operon gene amplification in the ga<sup>-</sup> strain are presumably due to low levels of contaminating bacterial gDNA.

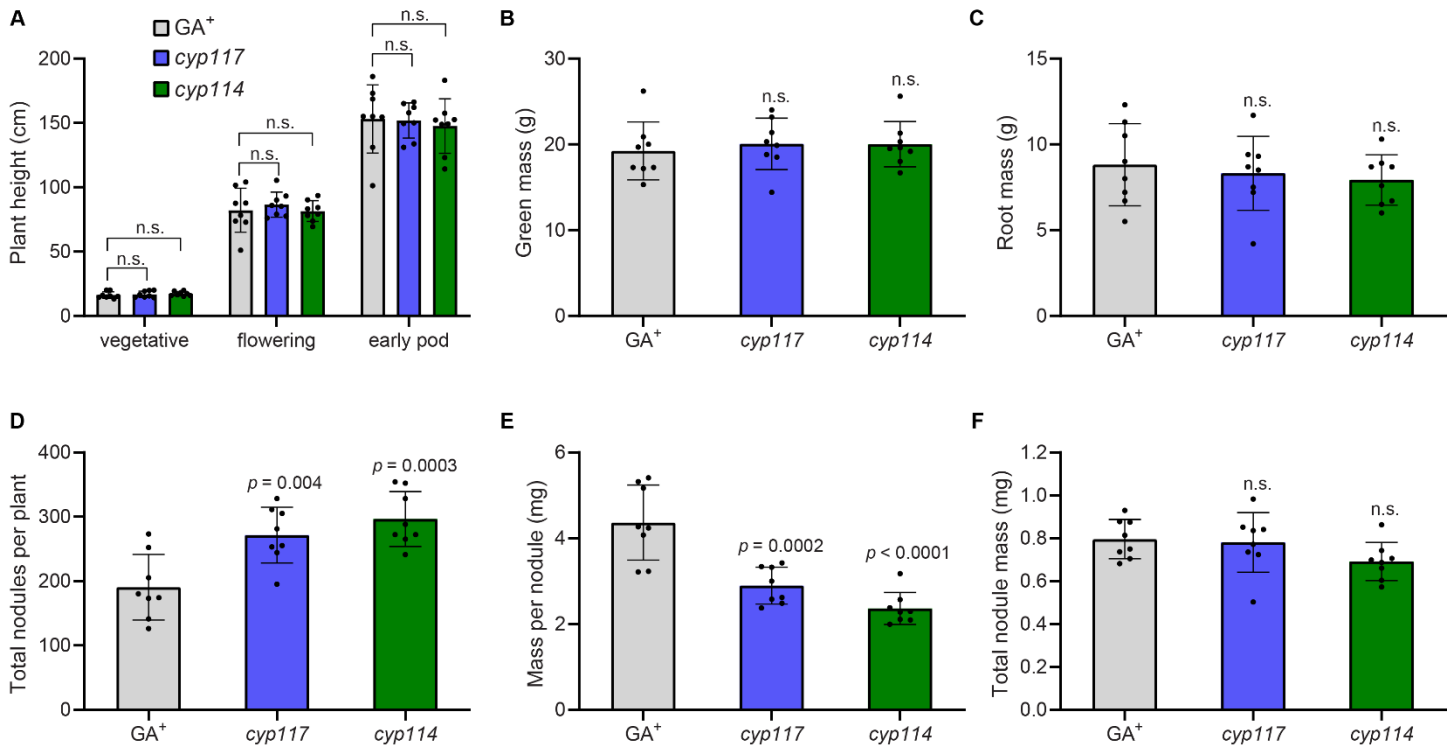

**Supplementary Figure 12. Soybean phenotypes associated with knockout of *cyp117* and *cyp114* in *B. diazoefficiens*.** Soybean plants were inoculated with wild-type (GA<sup>+</sup>) *B. diazoefficiens*, or with strains containing a knockout of *cyp117* (*BdΔcyp117* or *cyp114* (*BdΔcyp114*)). **A**) Plant height was measured for three different time points. At the early pod stage of the plants, the following phenotypic parameters were assessed: **B**) green mass, **C**) root mass, **D**) nodule number per plant, **E**) average mass per nodule, and **F**) total nodule mass per plant.  $n = 8$  for each treatment with means  $\pm$  SD shown. Statistical significance was assessed by using a two-way ANOVA and Dunnett's multiple comparison test with GA<sup>+</sup> as the control group. n.s. = not significant ( $p > 0.05$ ). For height measurements, statistical significance was determined between treatments within a single time point.



**A***B. diazoefficiens* USDA 110 (GA<sup>+</sup>)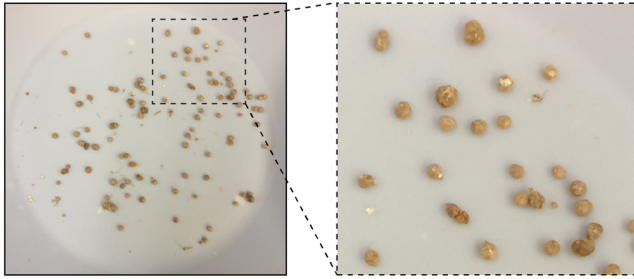*B. diazoefficiens* KB2011 (ga<sup>-</sup>)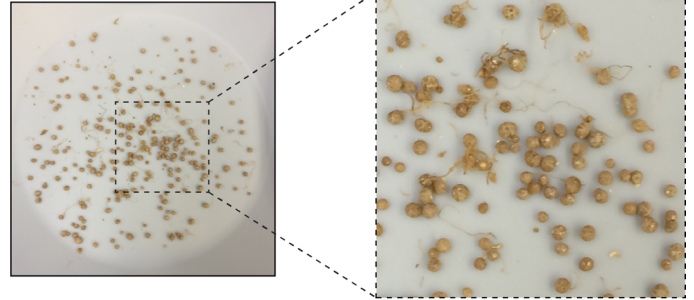**B***B. diazoefficiens* USDA 110 (GA<sup>+</sup>)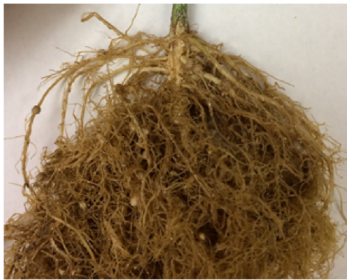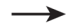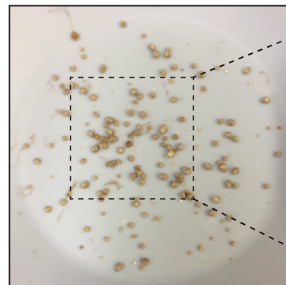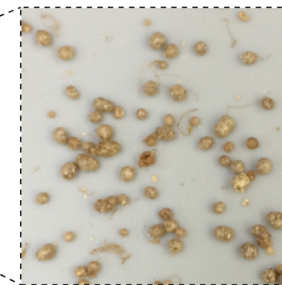*B. diazoefficiens*  $\Delta cyp117$ 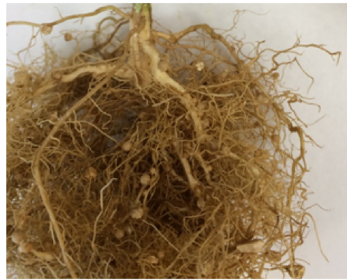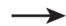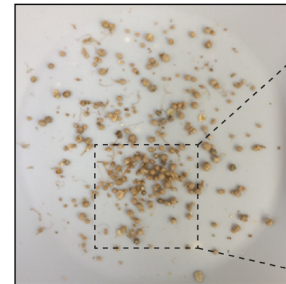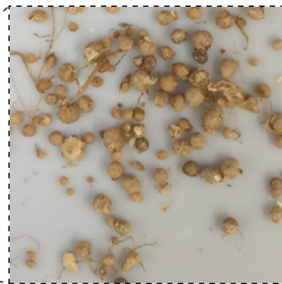*B. diazoefficiens*  $\Delta cyp114$ 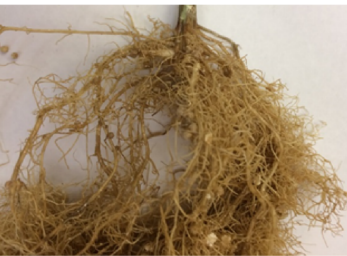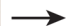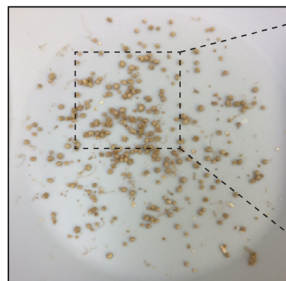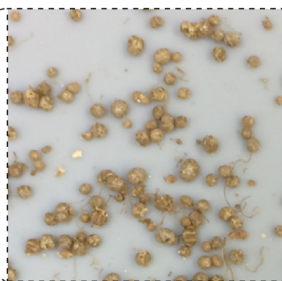

**Supplementary Figure 13. Representative images of GA<sup>+</sup> and ga<sup>-</sup> nodules.** **A)** All of the nodules from single representative *B. diazoefficiens* USDA 110 (GA<sup>+</sup>) and *B. diazoefficiens* KB2011 (ga<sup>-</sup>) plants are shown, as well as zoomed in images to better demonstrate nodule morphology and appearance. Each of these plants were from the same experiment. **B)** Roots, total nodules, and zoomed in nodule images from representative GA<sup>+</sup>, *BdΔcyp117*, and *BdΔcyp114* plants. These plants were all from the same experiment.



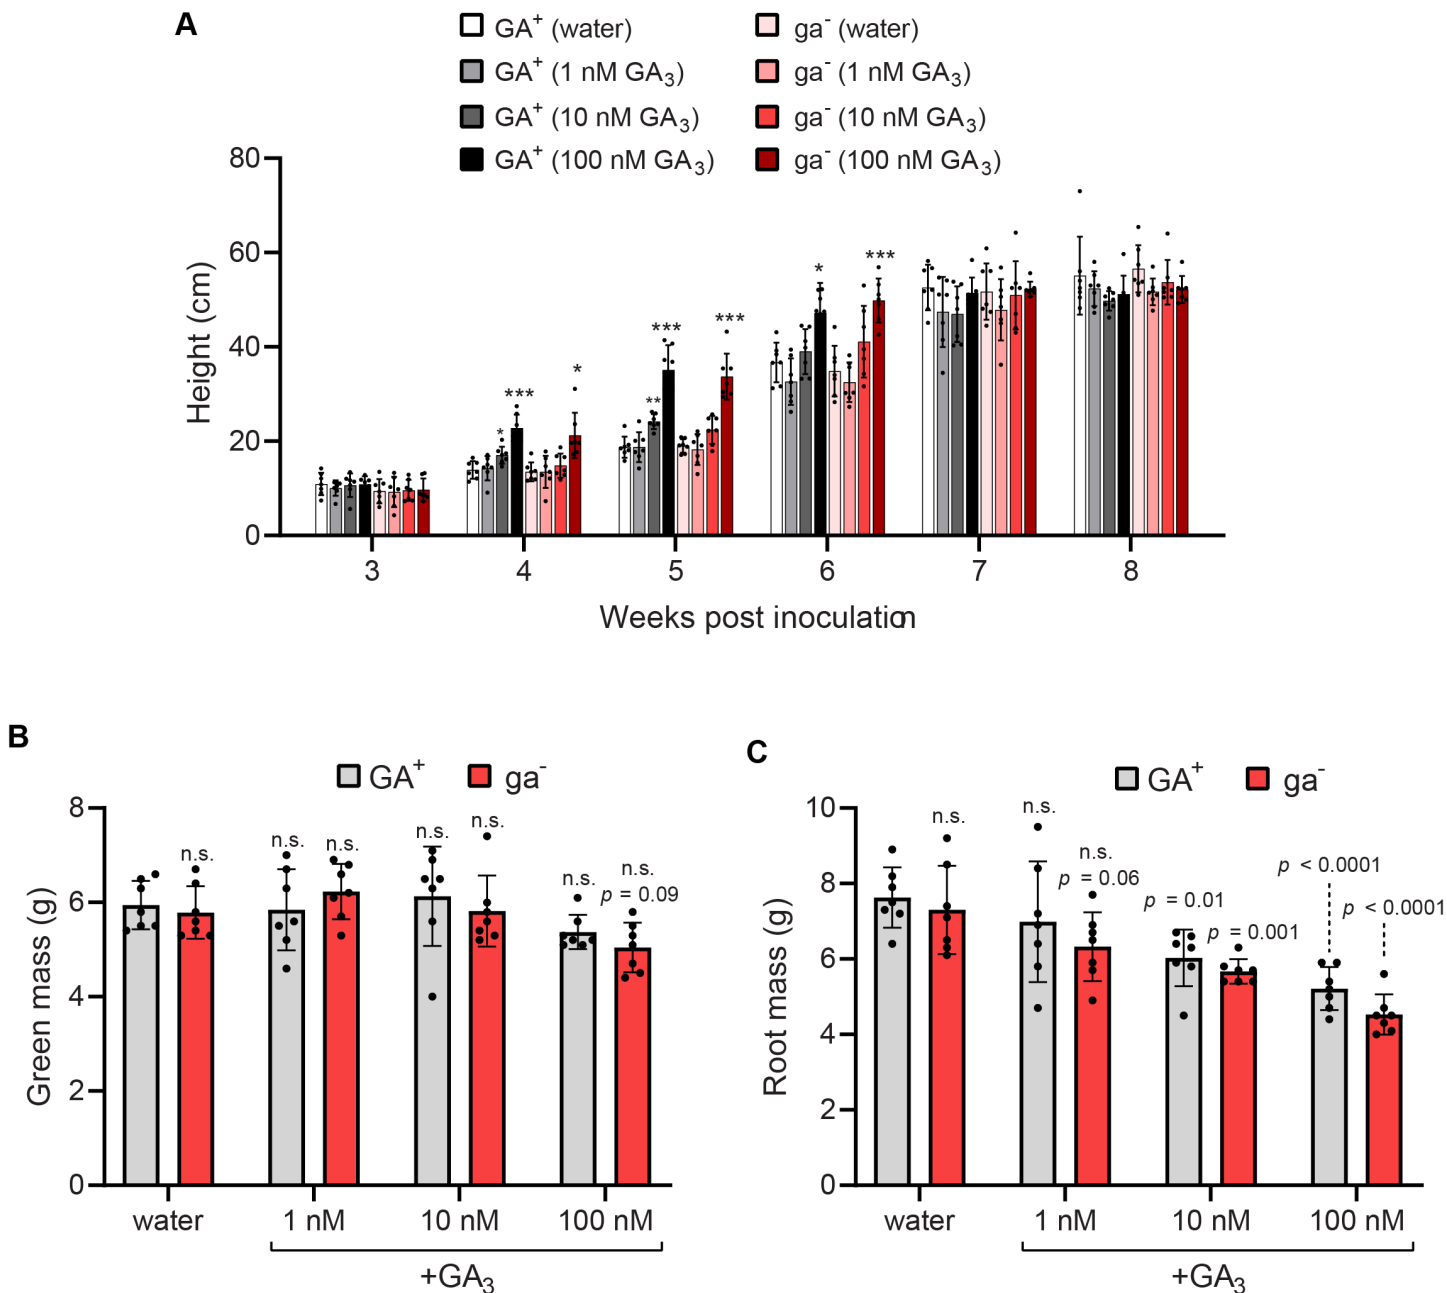

**Supplementary Figure 14. Effects of a range of GA<sub>3</sub> concentrations on plant height and mass.** The soil substrate of soybean plants in symbiosis with either GA<sup>+</sup> or ga<sup>-</sup> *B. diazoefficiens* were treated with several concentrations of GA<sub>3</sub> (1, 10, or 100 nM) or water. **A**) Plant height was measured over time. The following phenotypic measurements were assessed at the early pod stage: **B**) green mass and **C**) root mass. n = 7 for each treatment with means ± SD shown. Statistical significance was assessed using a two-way ANOVA and Dunnett's multiple comparison test, with the GA<sup>+</sup> water treatment used as the control. n.s. = not significant ( $p > 0.05$ ). For height measurements, statistical significance was only assessed between experimental treatments within a single time point. \* =  $p < 0.05$ , \*\* =  $p < 0.01$ , \*\*\* =  $p < 0.001$ . An absence of asterisks in panel "a" infers  $p > 0.05$ . Individual  $p$  values are shown if  $\leq 0.1$ .

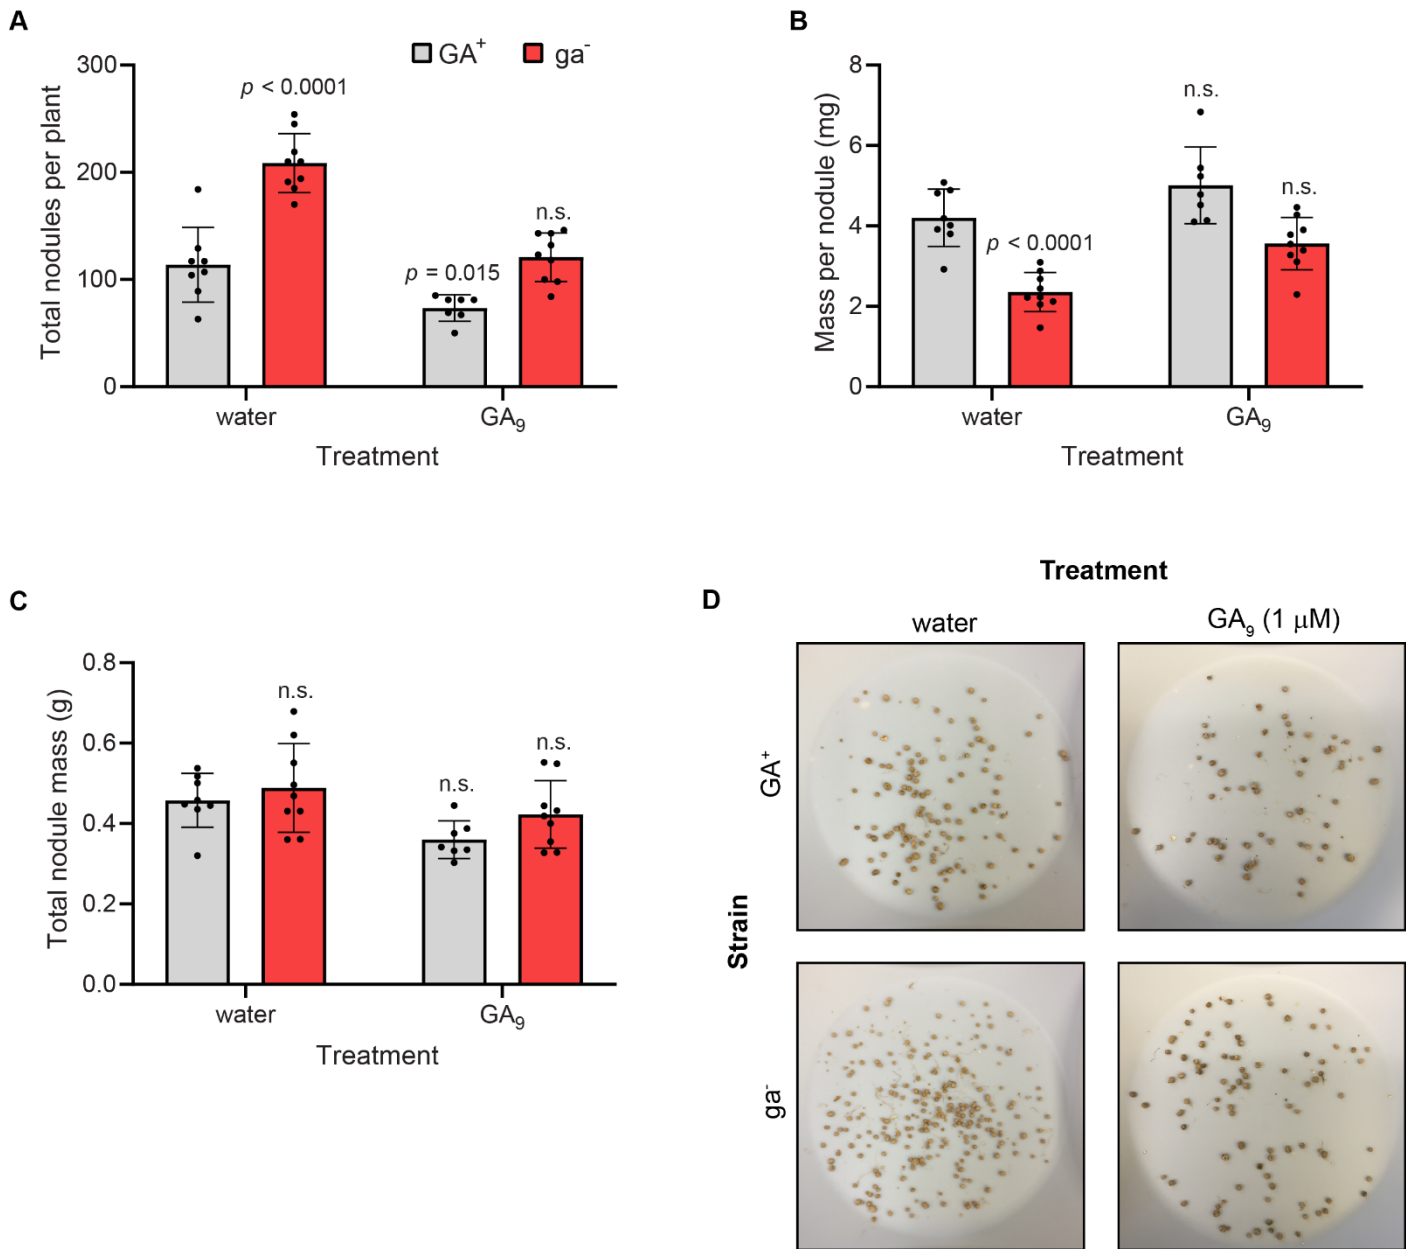

**Supplementary Figure 15. Chemical complementation with GA<sub>9</sub> rescues the ga<sup>-</sup> nodule phenotypes.** Nodule phenotypic characteristics were measured at the early pod stage following weekly application of GA<sub>9</sub> (1 μM) to the soil substrate of soybean plants nodulated with GA<sup>+</sup> or ga<sup>-</sup> *B. diazoefficiens*. **A**) Average number of nodules per plant. **B**) Average mass per nodule. **C**) Total nodule mass per plant. **D**) Representative root nodules from each experimental group. Each image shows nodules isolated from one plant. n = 7-9 plants per treatment. Shown for each experimental group is the mean ± SD. Statistical significance was assessed using a two-way ANOVA and Dunnett's multiple comparison test with the GA<sup>+</sup> water treatment as the control group. n.s. indicates  $p > 0.05$ . Individual  $p$  values are shown when  $\leq 0.1$ .

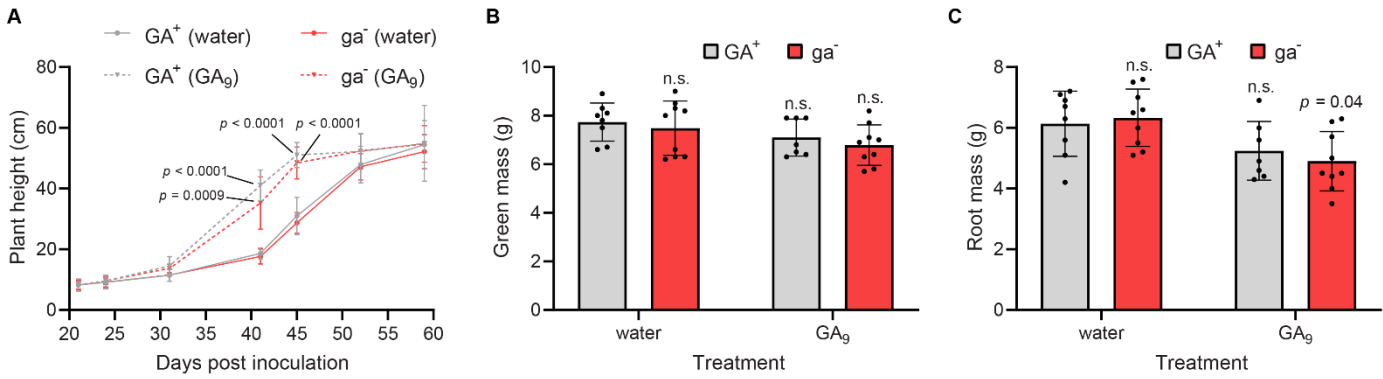

**Supplementary Figure 16. Effect of exogenous GA<sub>9</sub> on soybean growth phenotypes.** Following nodulation of soybean plants with GA<sup>+</sup> and ga<sup>-</sup> *B. diazoefficiens*, 1 μM GA<sub>9</sub> was applied twice per week to the soil. **A)** Plant height for these plants was measured over time. The following phenotypic characteristics were measured at the early pod stage of the plant: **B)** green mass and **C)** root mass. n = 7-9 per treatment with means ± SD shown. Statistical significance was determined using a two-way ANOVA and Dunnett's multiple comparison test, with the GA<sup>+</sup> water treatment used as the control. For height measurements in panel **A**, statistical significance was only assessed between treatments within a single time point. n.s. = not significant ( $p > 0.05$ ). In panel "a", if no  $p$  value is given, then the experimental group has a  $p$  value  $> 0.05$ .

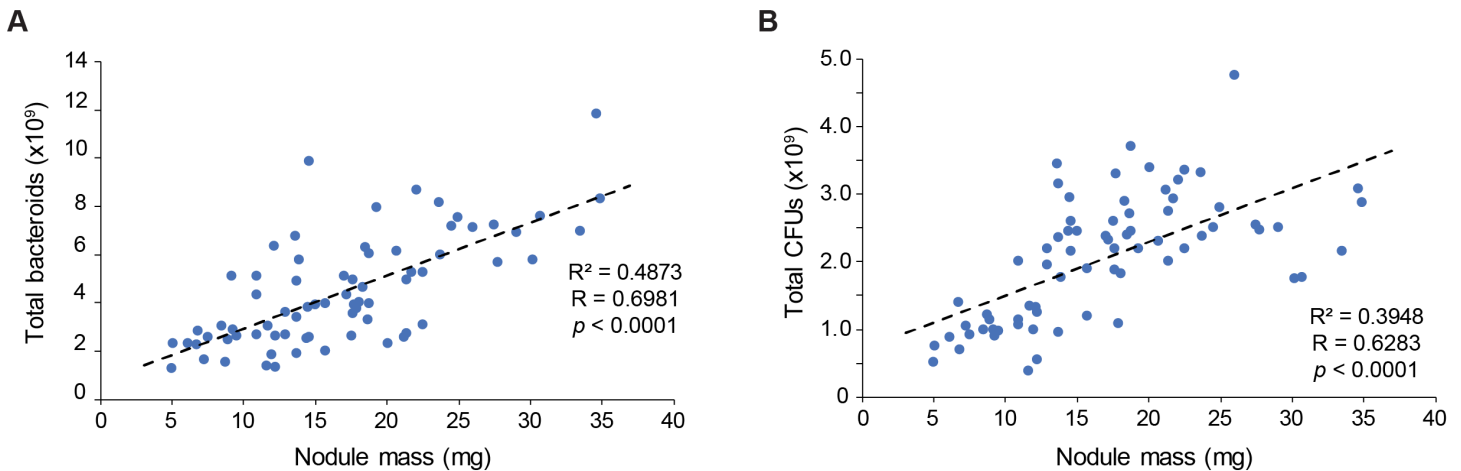

**Supplementary Figure 17. Correlations between nodule size and bacteroid numbers.** **A)** Total bacteroid cells extracted from nodules of varying sizes, as counted with flow cytometry, in relation to the mass of the nodule from which they were isolated. **B)** The total number of viable cells in the same samples was determined by plating for colony-forming units (CFUs). Data sets were analyzed in JMP Pro 13 to obtain statistical parameters of linear regressions.

**Supplementary Table 1.** Bacterial strains used in this study.

| <b>Strain</b>                                                                                              | <b>Description</b>                                                                                                                                                                                                                                                                                            | <b>Source</b>            |
|------------------------------------------------------------------------------------------------------------|---------------------------------------------------------------------------------------------------------------------------------------------------------------------------------------------------------------------------------------------------------------------------------------------------------------|--------------------------|
| One Shot® TOP10 Chemically Competent <i>E. coli</i>                                                        | F- <i>mcrA</i> , $\Delta$ ( <i>mrr-hsdRMS-mcrBC</i> ), $\Phi$ 80 <i>lacZ</i> $\Delta$ M15, $\Delta$ <i>lacX74</i> , <i>recA1</i> , <i>araD139</i> , $\Delta$ ( <i>araleu</i> )7697, <i>galU</i> , <i>galK</i> , <i>rpsL</i> ( <i>StrR</i> ), <i>endA1</i> , <i>nupG</i> ; for plasmid propagation and cloning | Thermo Fisher Scientific |
| One Shot® BL21 Star™ (DE3) Chemically Competent <i>E. coli</i>                                             | F- <i>ompT hsdSB</i> ( <i>rB</i> -, <i>mB</i> -) <i>galdcmrne131</i> (DE3); for pET101 expression of soybean GA 3-oxidases                                                                                                                                                                                    | Thermo Fisher Scientific |
| <i>E. coli</i> S17-1 $\lambda$ <i>pir</i>                                                                  | F-, <i>RP4-2</i> ( <i>Km</i> :: <i>Tn7</i> , <i>Tc</i> :: <i>Mu-1</i> ), <i>pro-82</i> , <i>LAMPir</i> , <i>recA1</i> , <i>endA1</i> , <i>thiE1</i> , <i>hsdR17</i> , <i>creC510</i> ; for creating the <i>B. diazoefficiens</i> insertional mutant strain <i>BdKB2011</i>                                    | [2]                      |
| <i>Bradyrhizobium diazoefficiens</i> USDA 110 ( <i>Bd</i> USDA110, formerly <i>B. japonicum</i> USDA 110,) | wild-type rhizobial symbiont of <i>Glycine max</i> ; Cm <sup>R</sup> , Tm <sup>R</sup>                                                                                                                                                                                                                        | USDA; Beltsville, MD     |
| <i>B. diazoefficiens</i> KB2011 ( <i>Bd</i> KB2011)                                                        | <i>B. diazoefficiens</i> USDA 110 derived strain containing an insertion in <i>cyp112</i> for disruption of the entire GA operon                                                                                                                                                                              | This study               |
| <i>Bd</i> $\Delta$ <i>cyp117</i>                                                                           | <i>cyp117</i> deletion strain derived from <i>B. diazoefficiens</i> USDA 110 parent strain; Cm <sup>R</sup>                                                                                                                                                                                                   | [3]                      |
| <i>Bd</i> $\Delta$ <i>cyp114</i>                                                                           | <i>cyp114</i> deletion strain derived from <i>B. diazoefficiens</i> USDA 110 parent strain; Cm <sup>R</sup>                                                                                                                                                                                                   | [3]                      |

**Supplementary Table 2.** Primers used in this study. Restriction sites are indicated with underlined nucleotide sequence. bp = base pairs, kb = kilobase.

| Primer                                                                                                                                    | Sequence (5' to 3')                          | Description                                                                                                                             |
|-------------------------------------------------------------------------------------------------------------------------------------------|----------------------------------------------|-----------------------------------------------------------------------------------------------------------------------------------------|
| <i>For cloning synthetic soybean GA 3-oxidases</i>                                                                                        |                                              |                                                                                                                                         |
| GmGA3ox4 F                                                                                                                                | CACCATGGTTACCACAC<br>TGAGCGAAG               | Forward primer for amplifying synthetic GmGA3ox4. Contains a 5' CACC for cloning into pET101/D-TOPO.                                    |
| GmGA3ox4 R                                                                                                                                | TTAGTTATTATTCAGCA<br>TGCTAATCAGGC            | Reverse primer for amplifying synthetic GmGA3ox4. Contains the native stop codon to prevent the addition of a His tag in pET101/D-TOPO. |
| GmGA3ox6 F                                                                                                                                | CACCATGGCAACCAC<br>ACTGAGCGAAG               | Forward primer for amplifying synthetic GmGA3ox6. Contains a 5' CACC for cloning into pET101/D-TOPO.                                    |
| GmGA3ox6 R                                                                                                                                | TTAGTTTTTCAGCAT<br>GCTAATCAGGCTC             | Reverse primer for amplifying synthetic GmGA3ox6. Contains the native stop codon to prevent the addition of a His tag in pET101/D-TOPO. |
| <i>For amplifying a fragment containing cyp112 and flanking sequences for creation of the B. diazoefficiens KB2011 insertional mutant</i> |                                              |                                                                                                                                         |
| Bd-cyp112-PmeI-F                                                                                                                          | CCACGTTTAAACTCG<br>AACCTCCTTCACCAAT<br>CCGTA | Forward primer upstream of <i>cyp112</i> . Contains PmeI restriction site at the 5' end.                                                |
| Bd-cyp112-PmeI-R                                                                                                                          | CTCCGTTTAAACTGTC<br>GATCTGGCCCATGGT<br>GAAAT | Reverse primer downstream of <i>cyp112</i> . Contains PmeI restriction site at the 5' end.                                              |
| <i>For confirming insertion within cyp112 in B. diazoefficiens KB2011</i>                                                                 |                                              |                                                                                                                                         |
| Bd-CYP112-kb F                                                                                                                            | TGGTGGGTGACAGGCT<br>ATGACGAGG                | Forward primer 5' to the ~2 kb cassette insertion site in <i>cyp112</i> .                                                               |

Wild-type amplicon = 762 bp;  
insertion mutant = 2.8 kb

Bd-CYP112-kb R

TCACGTCGGTCCTCGGA  
TAGCGCATG

Reverse primer 3' to the ~2 kb  
cassette insertion site in *cyp112*.  
Wild-type amplicon = 762 bp;  
insertion mutant = 2.8 kb

*For confirming clean deletion  
strains of B. diaoefficiens  
USDA 110*

Bd-CYP117ko-check F

ATCGTCAACATGTCGTC  
GTGCCAGG

Forward primer ~400 bp upstream of  
*cyp117* to check for presence or  
deletion of this gene; wild-type  
fragment = 2.1 kb, knockout = 0.8  
kb

Bd-CYP117ko-check R

TGCGCCGGCAGCCAAA  
CAGAGC AAG

Reverse primer ~400 bp downstream  
of *cyp117* to check for presence or  
deletion of this gene; wild-type  
fragment = 2.1 kb, knockout = 0.8  
kb

Bd-CYP114ko-check F

ATTCCCGCGGAGAGCA  
AGGTGC

Forward primer ~400 bp upstream of  
*cyp114* to check for presence or  
deletion of this gene; wild-type  
fragment = 2.2 kb, knockout = 0.8  
kb

Bd-CYP114ko-check R

ATAGCCGCCGAGCCATC  
AATGT CGGC

Reverse primer ~400 bp downstream  
of *cyp114* to check for presence or  
deletion of this gene; wild-type  
fragment = 2.2 kb, knockout = 0.8  
kb

*To amplify fragments for use as  
templates in determining qPCR  
primer efficiency*

BdCYP112 frag-F

TGGTGGGTGACAGGCT  
ATGACGAGG

Forward primer; amplicon = ~ 800  
bp

BdCYP112 frag-R

TCACGTCGGTCCTCGGA  
TAGCGCATG

Reverse primer; amplicon = ~ 800  
bp

BdKS frag-F

ATGATCCAGACTGAAC  
GCGCGGTG

Forward primer; amplicon = 831 bp

BdKS frag-R

TGGTCGAGGTCCGGTAG  
TACTGC

Reverse primer; amplicon = 831 bp

BdhisS frag-F

ACCCAGAAACTGAAG  
GCGGCCTG

Forward primer; amplicon = 1.5 kb

|                 |                               |                                   |
|-----------------|-------------------------------|-----------------------------------|
| BdhisS frag-R   | CTAGCCCCAGCTCACGT<br>CATGGC   | Reverse primer; amplicon = 1.5 kb |
| GmGA3ox4 frag-F | ATGCATGGCCTCAATCT<br>GAAGATGG | Forward primer; amplicon = 863 bp |
| GmGA3ox4 frag-R | TCAAGGAACGAAACCG<br>AGGCAAGG  | Reverse primer; amplicon = 863 bp |
| GmGA3ox6 frag-F | TTCACTTAGGACCTTAC<br>CTGATTCG | Forward primer; amplicon = 877 bp |
| GmGA3ox6 frag-R | AATCAAGAACCAAAGG<br>AGAAACCAC | Reverse primer; amplicon = 877 bp |
| cons7 frag-F    | AGTCTCCTGGTAACATT<br>GAGCAAAG | Forward primer; amplicon = 540 bp |
| cons7 frag-R    | ATGAGAGTGCCCAATAT<br>TACAGGTG | Reverse primer; amplicon = 540 bp |

*To check for expression of the 6  
GA3ox isoforms in soybean*

|                  |                                |                                                                                   |
|------------------|--------------------------------|-----------------------------------------------------------------------------------|
| GmGA3ox1 check-F | ACTGTCAACCCAATGAT<br>GATGCATC  | Forward primer; amplicon = 796 bp<br>after splicing of an intron from the<br>gene |
| GmGA3ox1 check-R | CATCGGTGGAGAATAG<br>AAATAAGCC  | Reverse primer; amplicon = 796 bp<br>after splicing of an intron from the<br>gene |
| GmGA3ox2 check-F | ATGGTCTCACTCTCAAC<br>CCAACGATG | Forward primer; amplicon = 851 bp<br>after splicing of an intron from the<br>gene |
| GmGA3ox2 check-R | ACAGAGTCAACTAAAG<br>GAGAAACC   | Reverse primer; amplicon = 851 bp<br>after splicing of an intron from the<br>gene |
| GmGA3ox3 check-F | ACACAAGCACCCCTGACT<br>TAAACTCC | Forward primer; amplicon = 952 bp<br>after splicing of an intron from the<br>gene |
| GmGA3ox3 check-R | TGCCAAGGTACTCATTC<br>CAAGTCAC  | Reverse primer; amplicon = 952 bp<br>after splicing of an intron from the<br>gene |

|                  |                               |                                                                                   |
|------------------|-------------------------------|-----------------------------------------------------------------------------------|
| GmGA3ox4 check-F | ATGCATGGCCTCAATCT<br>GAAGATGG | Forward primer; amplicon = 863 bp<br>after splicing of an intron from the<br>gene |
| GmGA3ox4 check-R | TCAAGGAACGAAACCG<br>AGGCAAGG  | Reverse primer; amplicon = 863 bp<br>after splicing of an intron from the<br>gene |
| GmGA3ox5 check-F | AGTCTTACACTTGGACA<br>CACCATGG | Forward primer; amplicon = 909 bp<br>after splicing of an intron from the<br>gene |
| GmGA3ox5 check-R | AGGTACTCATTCCAAGT<br>CACTGCC  | Reverse primer; amplicon = 909 bp<br>after splicing of an intron from the<br>gene |
| GmGA3ox6 check-F | TTCACTTAGGACCTTAC<br>CTGATTCG | Forward primer; amplicon = 877 bp<br>after splicing of an intron from the<br>gene |
| GmGA3ox6 check-R | AATCAAGAACCAAAGG<br>AGAAACCAC | Reverse primer; amplicon = 877 bp<br>after splicing of an intron from the<br>gene |

**Supplementary Table 3.** Plasmids and expression constructs used in this study.

| Plasmid/construct                             | Description                                                                                                                                         | Source                   |
|-----------------------------------------------|-----------------------------------------------------------------------------------------------------------------------------------------------------|--------------------------|
| <i>Plasmids</i>                               |                                                                                                                                                     |                          |
| pCR <sup>TM</sup> -Blunt II-TOPO <sup>®</sup> | For cloning and propagation of blunt-end PCR<br>constructs; Km <sup>R</sup>                                                                         | Thermo Fisher Scientific |
| pET101/D-TOPO <sup>®</sup>                    | For directional cloning and expression;<br>contains C-terminal His-tag; Cb <sup>R</sup>                                                             | Thermo Fisher Scientific |
| pJET                                          | For cloning of the DNA fragments from <i>B.</i><br><i>diazoefficiens</i> used to create the insertional<br>mutant <i>BdKB2011</i> ; Cb <sup>R</sup> | Thermo Fisher Scientific |
| pLO1                                          | Mobilizable, mating/SacB counterselection<br>vector; Km <sup>R</sup>                                                                                | [4]                      |
| pLOBJ3                                        | pLO1 containing the GA operon knockout<br>cassette used to create the insertional<br>knockout strain <i>BdKB2011</i> ; Km <sup>R</sup>              | This study               |
| <i>Expression constructs</i>                  |                                                                                                                                                     |                          |
| pET101-sGmGA3ox4                              | For expression of synthetic soybean GA3ox4<br>in <i>E. coli</i> ; Cb <sup>R</sup>                                                                   | This study               |
| pET101-sGmGA3ox6                              | For expression of synthetic soybean GA3ox6<br>in <i>E. coli</i> ; Cb <sup>R</sup>                                                                   | This study               |



**Supplementary Table 4.** Primers used for qPCR for selected *Bradyrhizobium diazoefficiens* USDA 110 and soybean (*Glycine max* cv. Williams '82) gene transcripts.

| target                            | forward primer (5'-3')     | reverse primer (5'-3')      | amplicon size (bp) |
|-----------------------------------|----------------------------|-----------------------------|--------------------|
| <i>B. diazoefficiens</i><br>genes |                            |                             |                    |
| <i>cyp112</i>                     | ATCGAATTCGGCCTGCT<br>A     | AGGATTCCTCTACCG<br>CCTT     | 97                 |
| <i>sdr</i>                        | CATGCTGTCGTCCTCAC<br>TTG   | GAGGAGTCGCTCGGT<br>CAT      | 94                 |
| <i>ks</i>                         | CTACGCGAACGTGTTCT<br>GTT   | CAAGGTCGCCATATC<br>CAGC     | 64                 |
| <i>hisS</i>                       | GATGGAATACACCGAC<br>GCGCT  | AACGCAAGCTAATCC<br>ACTGCTCG | 106                |
| <i>G. max</i> genes               |                            |                             |                    |
| <i>GmGA3ox4</i>                   | ATCTGGCATAATGACTG<br>TGC   | GTTGGTTGAACCAATC<br>CACC    | 150                |
| <i>GmGA3ox6</i>                   | TCCATGTGATGATGCCA<br>AAAAG | TTTTGCTCCTCAGAAA<br>TGCCC   | 150                |
| <i>cons7</i>                      | ATGAATGACGGTTCCCA<br>TGTA  | AGCATTAAAGGCAGCT<br>CACTCT  | 114                |

#### SUPPLEMENTARY REFERENCES

1. Prentki P, Krisch HM. In vitro insertional mutagenesis with a selectable DNA fragment. *Gene* 1984; **29**: 303–313.
2. de Lorenzo V, Eltis L, Kessler B, Timmis KN. Analysis of *Pseudomonas* gene products using *lacI<sup>q</sup>/P<sub>trp</sub>-lac* plasmids and transposons that confer conditional phenotypes. *Gene* 1993; **123**: 17–24.
3. Nett RS, Montanares M, Marcassa A, Lu X, Nagel R, Charles TC, et al. Elucidation of gibberellin biosynthesis in bacteria reveals convergent evolution. *Nat Chem Biol* 2017; **13**: 69–74.
4. Lenz O, Schwartz E, Dervede J. The *Alcaligenes eutrophus* H16 *hoxX* gene participates in hydrogenase regulation. *J Bacteriol* 1994; **176**: 4385–4393.
